# Supplementary material for: The Effect of Preoperative Carbohydrate Loading on Clinical and Biochemical Outcomes after Cardiac Surgery: A Systematic Review and Meta-Analysis of Randomized Trials
Source: PubMed Central journal article supplement (PMC7600335; doi:10.3390/nu12103105), 2020-10-12
Supplement: nutrients-12-03105-s001.pdf [file nutrients-12-03105-s001.pdf]

**Table S1.** The risk of bias assessment.

| Study                          | Random sequence generation (selection bias) | Allocation concealment (selection bias) | Blinding of participants and personnel (performance bias) | Blinding of outcome assessment (detection bias) | Incomplete outcome data addressed (attrition bias) | Selective reporting (reporting bias) | Other bias | Number of "Low" assessments | High quality (>3 low risk assessments) vs low (≤3 low risk assessments) |
|--------------------------------|---------------------------------------------|-----------------------------------------|-----------------------------------------------------------|-------------------------------------------------|----------------------------------------------------|--------------------------------------|------------|-----------------------------|-------------------------------------------------------------------------|
| Feguri et al., 2017            | L                                           | L                                       | L                                                         | U                                               | L                                                  | L                                    | L          | 6                           | <b>HQ</b>                                                               |
| Feguri et al., 2019            | L                                           | L                                       | L                                                         | U                                               | L                                                  | L                                    | L          | 6                           | <b>HQ</b>                                                               |
| Feguri et al., 2012            | L                                           | U                                       | L                                                         | U                                               | L                                                  | L                                    | L          | 5                           | <b>HQ</b>                                                               |
| Jarvela et al., 2008           | L                                           | H                                       | H                                                         | U                                               | L                                                  | L                                    | L          | 4                           | <b>HQ</b>                                                               |
| Lee et al., 2017               | L                                           | L                                       | L                                                         | U                                               | L                                                  | L                                    | L          | 6                           | <b>HQ</b>                                                               |
| Savluk et al., 2017            |                                             |                                         |                                                           |                                                 |                                                    |                                      |            |                             |                                                                         |
| Savluk et al., 2017            | U                                           | U                                       | U                                                         | U                                               | L                                                  | L                                    | L          | 3                           | <b>LQ</b>                                                               |
| Savluk et al., 2017            |                                             |                                         |                                                           |                                                 |                                                    |                                      |            |                             |                                                                         |
| Sokolic et al., 2019a, Croatia | L                                           | U                                       | U                                                         | U                                               | L                                                  | U                                    | L          | 3                           | <b>LQ</b>                                                               |
| Sokolic et al., 2019b, Croatia |                                             |                                         |                                                           |                                                 |                                                    |                                      |            |                             |                                                                         |
| Tran et al., 2009              | U                                           | U                                       | L                                                         | U                                               | U                                                  | L                                    | L          | 3                           | <b>LQ</b>                                                               |
| Rapp-Kesek et al., 2007        | U                                           | U                                       | U                                                         | U                                               | L                                                  | L                                    | L          | 3                           | <b>LQ</b>                                                               |

L - low risk of bias; U - unclear risk of bias; H - high risk of bias; HQ - high quality; LQ - low quality

**Table S2.** The results of continuous outcomes meta-analysis

| Outcome/References                              | ENDPOINT DATA       |                |                         |                       |                           |                     |
|-------------------------------------------------|---------------------|----------------|-------------------------|-----------------------|---------------------------|---------------------|
| <b>Blood loss [ml]</b>                          |                     |                |                         |                       |                           |                     |
| Feguri et al., 2017, Brazil                     | <b>SMD (95% CI)</b> | <b>Z-value</b> | <b>Heterogeneity</b>    | <b>Tau</b>            | <b>Intercept (95%CI)†</b> | <b>Egger's test</b> |
| Savluk et al., 2017a, Turkey                    |                     |                |                         |                       |                           |                     |
| Savluk et al., 2017b, Turkey                    | 0,239               | 1,912          | Q=1,058                 | t <sup>2</sup> =0     | 2,383 (-1,331; 6,098)     | p=0,110             |
| Savluk et al., 2017c, Turkey                    | (-0,006; 0,484)     | p=0,056        | p=0,787 (df=3)          | t=0                   |                           |                     |
|                                                 |                     |                | I <sup>2</sup> =0%      |                       |                           |                     |
| <b>Duration of mechanical ventilation [hrs]</b> |                     |                |                         |                       |                           |                     |
| Feguri et al., 2017, Brazil                     | <b>SMD (95% CI)</b> | <b>Z-value</b> | <b>Heterogeneity</b>    | <b>Tau</b>            | <b>Intercept (95%CI)†</b> | <b>Egger's test</b> |
| Feguri et al., 2012, Brazil                     |                     |                |                         |                       |                           |                     |
| Savluk et al., 2017a, Turkey                    | -0,14               | -1,204         | Q=1,828                 | t <sup>2</sup> =0     | 1,653 (-3,222; 6,529)     | p=0,359             |
| Savluk et al., 2017b, Turkey                    | (-0,368; 0,088)     | p=0,229        | p=0,767 (df=4)          | t=0                   |                           |                     |
| Savluk et al., 2017c, Turkey                    |                     |                | I <sup>2</sup> =0%      |                       |                           |                     |
| <b>ICU stay [hrs]</b>                           |                     |                |                         |                       |                           |                     |
| Feguri et al., 2017, Brazil                     | <b>SMD (95% CI)</b> | <b>Z-value</b> | <b>Heterogeneity</b>    | <b>Tau</b>            | <b>Intercept (95%CI)†</b> | <b>Egger's test</b> |
| Feguri et al., 2012, Brazil                     |                     |                |                         |                       |                           |                     |
| Jarvela et al., 2008, Finland                   | -0,542              | -4,307         | Q=7,221                 | t <sup>2</sup> =0,029 | -2,163 (-8,695; 4,368)    | p=0,409             |
| Savluk et al., 2017a, Turkey                    | (-0,789; -0,295)    | p<0,001        | p=0,205 (df=5)          | t=0,17                |                           |                     |
| Savluk et al., 2017b, Turkey                    |                     |                | I <sup>2</sup> =30,756% |                       |                           |                     |
| Savluk et al., 2017c, Turkey                    |                     |                |                         |                       |                           |                     |
|                                                 | <b>DM (95% CI)</b>  | <b>Z-value</b> | <b>Heterogeneity</b>    | <b>Tau</b>            | <b>Intercept (95%CI)†</b> | <b>Egger's test</b> |

-25,925 (-44,568; -7,283)    -2,726 p=0,006    Q=28,802 p<0,001 (df=5) I<sup>2</sup>=82,640%    t<sup>2</sup>=333,603 t=18,265    -2,372 (-4,244; -0,500)    p=0,024\*

| <b>Duration of surgery [min]</b> |                     |                |                         |                       |                           |                      |
|----------------------------------|---------------------|----------------|-------------------------|-----------------------|---------------------------|----------------------|
|                                  | <b>SMD (95% CI)</b> | <b>Z-value</b> | <b>Heterogeneity</b>    | <b>Tau</b>            | <b>Intercept (95%CI)†</b> | <b>Egger's test</b>  |
| Feguri et al., 2017, Brazil      |                     |                |                         |                       |                           |                      |
| Feguri et al., 2012, Brazil      |                     |                |                         |                       |                           |                      |
| Jarvela et al., 2008, Finland    | -0,033              | -0,22          | Q=14,781                | t <sup>2</sup> =0,093 | 2,223 (-6,296; 10,744)    | p=0,531              |
| Lee et al., 2017, Korea          | (-0,331; 0,264)     | p=0,826        | p=0,022 (df=6)          | t=0,3                 |                           |                      |
| Savluk et al., 2017a, Turkey     |                     |                | I <sup>2</sup> =59,407% |                       |                           |                      |
| Savluk et al., 2017b, Turkey     |                     |                |                         |                       |                           |                      |
| Savluk et al., 2017c, Turkey     |                     |                |                         |                       |                           |                      |
| <b>CPB duration [min]</b>        |                     |                |                         |                       |                           |                      |
|                                  | <b>SMD (95% CI)</b> | <b>Z-value</b> | <b>Heterogeneity</b>    | <b>Tau</b>            | <b>Intercept (95%CI)†</b> | <b>Egger's test</b>  |
| Feguri et al., 2017, Brazil      |                     |                |                         |                       |                           |                      |
| Feguri et al., 2012, Brazil      |                     |                |                         |                       |                           |                      |
| Savluk et al., 2017a, Turkey     | -0,019              | -0,166         | Q=2,273                 | t <sup>2</sup> =0     | 3,233 (0,946; 5,521)      | p=0,020**            |
| Savluk et al., 2017b, Turkey     | (-0,247; 0,208)     | p=0,868        | p=0,686 (df=4)          | t=0                   |                           |                      |
| Savluk et al., 2017c, Turkey     |                     |                | I <sup>2</sup> =0%      |                       |                           |                      |
| <b>AC duration [min]</b>         |                     |                |                         |                       |                           |                      |
|                                  | <b>SMD (95% CI)</b> | <b>Z-value</b> | <b>Heterogeneity</b>    | <b>Tau</b>            | <b>Intercept (95%CI)†</b> | <b>Egger's test</b>  |
| Feguri et al., 2017, Brazil      |                     |                |                         |                       |                           |                      |
| Feguri et al., 2012, Brazil      |                     |                |                         |                       |                           |                      |
| Savluk et al., 2017a, Turkey     | -0,28               | -2,266         | Q=4,397                 | t <sup>2</sup> =0,007 | 4,810 (2,525; 7,096)      | p=0,006 <sup>§</sup> |
| Savluk et al., 2017b, Turkey     | (-0,521; -0,038)    | p=0,023        | p=0,355 (df=4)          | t=0,08                |                           |                      |
| Savluk et al., 2017c, Turkey     |                     |                | I <sup>2</sup> =9,021%  |                       |                           |                      |
|                                  | <b>DM (95% CI)</b>  | <b>Z-value</b> | <b>Heterogeneity</b>    | <b>Tau</b>            | <b>Intercept (95%CI)†</b> | <b>Egger's test</b>  |
|                                  | -6,388              | -2,577         | Q=3,988                 | t <sup>2</sup> =0     | 3,821(3,008; 4,634)       | p<0,001 <sup>^</sup> |
|                                  | (-11,246; -1,529)   | p=0,010        | p=0,408 (df=4)          | t=0                   |                           |                      |
|                                  |                     |                | I <sup>2</sup> =0%      |                       |                           |                      |

| <b>Exogenous insulin in the ICU/post-operatively [IU]</b> |                            |                   |                                                 |                          |                           |                     |
|-----------------------------------------------------------|----------------------------|-------------------|-------------------------------------------------|--------------------------|---------------------------|---------------------|
|                                                           | <b>SMD (95% CI)</b>        | <b>Z-value</b>    | <b>Heterogeneity</b>                            | <b>Tau</b>               | <b>Intercept (95%CI)†</b> | <b>Egger's test</b> |
| Feguri et al., 2019, Brazil                               |                            |                   |                                                 |                          |                           |                     |
| Feguri et al., 2012, Brazil                               |                            |                   |                                                 |                          |                           |                     |
| Jarvela et al., 2008, Finland                             | -0,349<br>(-0,653; -0,044) | -2,246<br>p=0,025 | Q=1,153<br>p=0,562 (df=2)<br>I <sup>2</sup> =0% | t <sup>2</sup> =0<br>t=0 | -1,296 (-24,288; 21,695)  | p=0,604             |
|                                                           | <b>DM (95% CI)</b>         | <b>Z-value</b>    | <b>Heterogeneity</b>                            | <b>Tau</b>               | <b>Intercept (95%CI)†</b> | <b>Egger's test</b> |
|                                                           | -4,523<br>(-8,417; -0,630) | -2,277<br>p=0,023 | Q=1,264<br>p=0,532 (df=2)<br>I <sup>2</sup> =0% | t <sup>2</sup> =0<br>t=0 | -1,445 (-26,582; 23,690)  | p=0,598             |

† Egger's regression intercept test for asymmetry of the funnel plots; AC – aortic clamping, CPB – cardio-pulmonary bypass, ICU – intensive care unit, ROB – risk of bias, T2DM -type 2 diabetes mellitus; \* after adjustment (no values added to left of mean; two value adjusted to right of mean: DM=-16.7960, 95% CI: -32.962 to -0.629); \*\* after adjustment (no values added to left of mean and to right of mean); \$ after adjustment (no values added to right of mean; one value added to left of mean: DM=-0.3364, 95% CI: -0.611 to -0.0613); ^ after adjustment (no values added to right of mean; one value added to left of mean: DM=-7.287, 95% CI: -12,9448 to -1.6294).

**Table S3.** The results of categorical outcomes meta-analysis.

| Outcome/References                        | ENDPOINT DATA           |                   |                                                      |                                  |                            |                     |
|-------------------------------------------|-------------------------|-------------------|------------------------------------------------------|----------------------------------|----------------------------|---------------------|
| <b>AMI</b>                                |                         |                   |                                                      |                                  |                            |                     |
| Feguri et al., 2017, Brazil               | <b>RR (95% CI)</b>      | <b>Z-value</b>    | <b>Heterogeneity</b>                                 | <b>Tau</b>                       | <b>Intercept (95%CI)†</b>  | <b>Egger's test</b> |
| Lee et al., 2017, Korea                   |                         |                   |                                                      |                                  |                            |                     |
| Tran et al., 2009, Canada                 |                         |                   |                                                      |                                  |                            |                     |
|                                           | 0,499<br>(0,086; 2,899) | -0,775<br>p=0,439 | Q=2,002<br>p=0,367 (df=2)<br>I <sup>2</sup> =0,111%  | t <sup>2</sup> =0,003<br>t=0,052 | 19,365 (-204,210; 242,941) | p=0,469             |
| <b>Transfusion requirement</b>            |                         |                   |                                                      |                                  |                            |                     |
| Feguri et al., 2019, Brazil               | <b>RR (95% CI)</b>      | <b>Z-value</b>    | <b>Heterogeneity</b>                                 | <b>Tau</b>                       | <b>Intercept (95%CI)†</b>  | <b>Egger's test</b> |
| Lee et al., 2017, Korea                   |                         |                   |                                                      |                                  |                            |                     |
| Tran et al., 2009, Canada                 |                         |                   |                                                      |                                  |                            |                     |
|                                           | 0,808<br>(0,357; 1,827) | -0,513<br>p=0,608 | Q=4,241<br>p=0,120 (df=2)<br>I <sup>2</sup> =52,843  | t <sup>2</sup> =0,275<br>t=0,525 | -1,054 (-76,702; 74,592)   | p=0,888             |
| <b>PONV</b>                               |                         |                   |                                                      |                                  |                            |                     |
| Feguri et al., 2017, Brazil               | <b>RR (95% CI)</b>      | <b>Z-value</b>    | <b>Heterogeneity</b>                                 | <b>Tau</b>                       | <b>Intercept (95%CI)†</b>  | <b>Egger's test</b> |
| Feguri et al., 2012, Brazil               |                         |                   |                                                      |                                  |                            |                     |
| Jarvela et al., 2008,<br>Finland          |                         |                   |                                                      |                                  |                            |                     |
|                                           | 0,993<br>(0,493; 2,0)   | -0,018<br>p=0,985 | Q=8,244<br>p=0,016 (df=2)<br>I <sup>2</sup> =75,741% | t <sup>2</sup> =0,263<br>t=0,513 | -2,264 (-43,670; 39,140)   | p=0,613             |
| <b>Vasoactive drugs intra-operatively</b> |                         |                   |                                                      |                                  |                            |                     |
| Feguri et al., 2017, Brazil               | <b>RR (95% CI)</b>      | <b>Z-value</b>    | <b>Heterogeneity</b>                                 | <b>Tau</b>                       | <b>Intercept (95%CI)†</b>  | <b>Egger's test</b> |
|                                           | 0,713                   | -1,067            | Q=6,028                                              | t <sup>2</sup> =0,194            | -4,117 (-33,466; 25,232)   | p=0,325             |

Feguri et al., 2012, Brazil (0,384; 1,327) p=0,286 p= 0,049 (df=2) t=0,441  
 I<sup>2</sup>=66,821%

Lee et al., 2017, Korea

| <b>Vasoactive drugs overall</b> | <b>RR (95% CI)</b> | <b>Z-value</b> | <b>Heterogeneity</b>    | <b>Tau</b>            | <b>Intercept (95%CI)†</b> | <b>Egger's test</b> |
|---------------------------------|--------------------|----------------|-------------------------|-----------------------|---------------------------|---------------------|
| Jarvela et al., 2008, Finland   | 1,007              | 0,061          | Q=7,654                 | t <sup>2</sup> =0,033 | -10,935 (-17,835; -4,034) | p=0,020             |
| Savluk et al., 2017a, Turkey    | (0,8; 1,268)       | p=0,951        | p=0,054 (df=3)          | t=0,183               |                           |                     |
| Savluk et al., 2017b, Turkey    |                    |                | I <sup>2</sup> =60,807% |                       |                           |                     |
| Savluk et al., 2017c, Turkey    |                    |                |                         |                       |                           |                     |

| <b>Acute atrial fibrillation</b> | <b>RR (95% CI)</b> | <b>Z-value</b> | <b>Heterogeneity</b> | <b>Tau</b>        | <b>Intercept (95%CI)†</b> | <b>Egger's test</b> |
|----------------------------------|--------------------|----------------|----------------------|-------------------|---------------------------|---------------------|
| Feguri et al., 2017, Brazil      | 0,774              | -0,817         | Q=0,082              | t <sup>2</sup> =0 | 0,383 (-3,131; 3,898)     | p=0,398             |
| Feguri et al., 2012, Brazil      | (0,418; 1,431)     | p=0,414        | p=0,960 (df=2)       | t=0               |                           |                     |
| Tran et al., 2009, Canada        |                    |                | I <sup>2</sup> =0%   |                   |                           |                     |

| <b>Infectious complications</b> | <b>RR (95% CI)</b> | <b>Z-value</b> | <b>Heterogeneity</b> | <b>Tau</b>        | <b>Intercept (95%CI)†</b> | <b>Egger's test</b> |
|---------------------------------|--------------------|----------------|----------------------|-------------------|---------------------------|---------------------|
| Feguri et al., 2017, Brazil     | 0,591              | -1,080         | Q=0,282              | t <sup>2</sup> =0 | -0,109(-2,242; 2,023)     | p=0,845             |
| Feguri et al., 2012, Brazil     | (0,227; 1,536)     | p=0,280        | p=0,963 (df=3)       | t=0               |                           |                     |
| Lee et al., 2017, Korea         |                    |                | I <sup>2</sup> =0%   |                   |                           |                     |
| Tran et al., 2009, Canada       |                    |                |                      |                   |                           |                     |

| <b>Insulin treatment</b>    | <b>RR (95% CI)</b> | <b>Z-value</b> | <b>Heterogeneity</b> | <b>Tau</b>            | <b>Intercept (95%CI)†</b> | <b>Egger's test</b> |
|-----------------------------|--------------------|----------------|----------------------|-----------------------|---------------------------|---------------------|
| Feguri et al., 2012, Brazil | 1,026              | 0,298          | Q=4,685              | t <sup>2</sup> =0,009 | 0,311 (-4,606; 5,230)     | p=0,810             |

Jarvela et al., 2008, Finland (0,868; 1,212) p=0,766 p=0,196 (df=3) t=0,097  
 Lee et al., 2017, Korea I<sup>2</sup>=35,968%  
 Tran et al., 2009, Canada

| <b>Arrythmia</b>             | <b>RR (95% CI)</b> | <b>Z-value</b> | <b>Heterogeneity</b> | <b>Tau</b>        | <b>Intercept (95%CI)†</b> | <b>Egger's test</b> |
|------------------------------|--------------------|----------------|----------------------|-------------------|---------------------------|---------------------|
| Lee et al., 2017, Korea      | 0,897              | -0,632         | Q=2,930              | t <sup>2</sup> =0 | -1,744(-7,700; 4,211)     | p=0,334             |
| Savluk et al., 2017a, Turkey | (0,641; 1,256)     | p=0,528        | p=0,403 (df=3)       | t=0               |                           |                     |
| Savluk et al., 2017b, Turkey |                    |                | I <sup>2</sup> =0%   |                   |                           |                     |
| Savluk et al., 2017c, Turkey |                    |                |                      |                   |                           |                     |

| <b>Inotropic drugs overall</b> | <b>RR (95% CI)</b> | <b>Z-value</b> | <b>Heterogeneity</b> | <b>Tau</b>        | <b>Intercept (95%CI)†</b> | <b>Egger's test</b> |
|--------------------------------|--------------------|----------------|----------------------|-------------------|---------------------------|---------------------|
| Feguri et al., 2012, Brazil    | 0,795              | -3,116         | Q=3,332              | t <sup>2</sup> =0 | -0,822 (-2,289; 0,644)    | p=0,194             |
| Lee et al., 2017, Korea        | (0,689; 0,919)     | p=0,002        | p=0,649 (df=5)       | t=0               |                           |                     |
| Savluk et al., 2017a, Turkey   |                    |                | I <sup>2</sup> =0%   |                   |                           |                     |
| Savluk et al., 2017b, Turkey   |                    |                |                      |                   |                           |                     |
| Savluk et al., 2017c, Turkey   |                    |                |                      |                   |                           |                     |
| Tran et al., 2009, Canada      |                    |                |                      |                   |                           |                     |

† Egger's regression intercept test for asymmetry of the funnel plots; ROB – risk of bias, T2DM - type 2 diabetes mellitus; AMI - acute myocardial infarction; PONV - postoperative nausea and vomiting

**Table S4.** GRADE analysis: quality assessment of evidence

| Certainty assessment                            |                   |                      |               |              |             |                      | № of patients           |                            | Effect            |                                                                | Certainty        |
|-------------------------------------------------|-------------------|----------------------|---------------|--------------|-------------|----------------------|-------------------------|----------------------------|-------------------|----------------------------------------------------------------|------------------|
| № of studies                                    | Study design      | Risk of bias         | Inconsistency | Indirectness | Imprecision | Other considerations | OCH loading (treatment) | fasting or water (control) | Relative (95% CI) | Absolute (95% CI)                                              |                  |
| <b>Blood loss (ml)</b>                          |                   |                      |               |              |             |                      |                         |                            |                   |                                                                |                  |
| 2<br>(4 interventions)                          | randomised trials | serious <sup>a</sup> | not serious   | not serious  | not serious | none                 | 127                     | 53                         | -                 | SMD<br><b>0.239 SD higher</b><br>(0.006 lower to 0.484 higher) | ⊕⊕⊕○<br>MODERATE |
| <b>Duration of mechanical ventilation (hrs)</b> |                   |                      |               |              |             |                      |                         |                            |                   |                                                                |                  |



| Certainty assessment               |                   |                          |                      |              |                          |                      | № of patients           |                            | Effect            |                                                                 | Certainty        |
|------------------------------------|-------------------|--------------------------|----------------------|--------------|--------------------------|----------------------|-------------------------|----------------------------|-------------------|-----------------------------------------------------------------|------------------|
| № of studies                       | Study design      | Risk of bias             | Inconsistency        | Indirectness | Imprecision              | Other considerations | OCH loading (treatment) | fasting or water (control) | Relative (95% CI) | Absolute (95% CI)                                               |                  |
| 3<br>(5 interventions)             | randomised trials | not serious <sup>b</sup> | not serious          | not serious  | not serious              | none                 | 147                     | 73                         | -                 | SMD 0.14<br>SD lower<br>(0.368<br>lower to<br>0.088<br>higher)  | ⊕⊕⊕⊕<br>HIGH     |
| <b>Duration of surgery (min)</b>   |                   |                          |                      |              |                          |                      |                         |                            |                   |                                                                 |                  |
| 5<br>(7 interventions)             | randomised trials | not serious <sup>c</sup> | serious <sup>d</sup> | not serious  | not serious              | none                 | 225                     | 153                        | -                 | SMD 0.033 SD<br>lower<br>(0.331<br>lower to<br>0.264<br>higher) | ⊕⊕⊕○<br>MODERATE |
| <b>CPB duration (min)</b>          |                   |                          |                      |              |                          |                      |                         |                            |                   |                                                                 |                  |
| 3<br>(5 interventions)             | randomised trials | not serious <sup>e</sup> | not serious          | not serious  | not serious <sup>f</sup> | none                 | 147                     | 73                         | -                 | SMD 0.019 SD<br>lower<br>(0.247<br>lower to<br>0.208<br>higher) | ⊕⊕⊕⊕<br>HIGH     |
| <b>Acute myocardial infarction</b> |                   |                          |                      |              |                          |                      |                         |                            |                   |                                                                 |                  |

| Certainty assessment                      |                   |                          |                          |                      |                      |                      | № of patients           |                            | Effect                              |                                                           | Certainty        |
|-------------------------------------------|-------------------|--------------------------|--------------------------|----------------------|----------------------|----------------------|-------------------------|----------------------------|-------------------------------------|-----------------------------------------------------------|------------------|
| № of studies                              | Study design      | Risk of bias             | Inconsistency            | Indirectness         | Imprecision          | Other considerations | OCH loading (treatment) | fasting or water (control) | Relative (95% CI)                   | Absolute (95% CI)                                         |                  |
| 3                                         | randomised trials | not serious <sup>g</sup> | not serious <sup>h</sup> | serious <sup>i</sup> | serious <sup>i</sup> | none                 | 1/55 (1.8%)             | 4/56 (7.1%)                | <b>RR 0.499</b><br>(0.086 to 2.899) | <b>36 fewer per 1000</b><br>(from 65 fewer to 136 more)   | ⊕⊕○○<br>LOW      |
| <b>Transfusion requirement</b>            |                   |                          |                          |                      |                      |                      |                         |                            |                                     |                                                           |                  |
| 3                                         | randomised trials | not serious <sup>k</sup> | serious <sup>l</sup>     | serious <sup>m</sup> | serious <sup>n</sup> | none                 | 16/55 (29.1%)           | 20/56 (35.7%)              | <b>RR 0.808</b><br>(0.357 to 1.827) | <b>69 fewer per 1000</b><br>(from 230 fewer to 295 more)  | ⊕○○○<br>VERY LOW |
| <b>PONV</b>                               |                   |                          |                          |                      |                      |                      |                         |                            |                                     |                                                           |                  |
| 3                                         | randomised trials | not serious              | serious <sup>o</sup>     | not serious          | serious <sup>p</sup> | none                 | 49/84 (58.3%)           | 42/85 (49.4%)              | <b>RR 0.993</b><br>(0.493 to 2.000) | <b>3 fewer per 1000</b><br>(from 251 fewer to 494 more)   | ⊕⊕○○<br>LOW      |
| <b>Vasoactive drugs intra-operatively</b> |                   |                          |                          |                      |                      |                      |                         |                            |                                     |                                                           |                  |
| 3                                         | randomised trials | not serious              | serious <sup>q</sup>     | not serious          | serious <sup>r</sup> | none                 | 29/62 (46.8%)           | 38/63 (60.3%)              | <b>RR 0.713</b><br>(0.384 to 1.327) | <b>173 fewer per 1000</b><br>(from 372 fewer to 197 more) | ⊕⊕○○<br>LOW      |

| Certainty assessment             |                   |                          |                          |                      |                      |                      | № of patients           |                            | Effect                              |                                                          | Certainty        |
|----------------------------------|-------------------|--------------------------|--------------------------|----------------------|----------------------|----------------------|-------------------------|----------------------------|-------------------------------------|----------------------------------------------------------|------------------|
| № of studies                     | Study design      | Risk of bias             | Inconsistency            | Indirectness         | Imprecision          | Other considerations | OCH loading (treatment) | fasting or water (control) | Relative (95% CI)                   | Absolute (95% CI)                                        |                  |
| <b>Vasoactive drugs overall</b>  |                   |                          |                          |                      |                      |                      |                         |                            |                                     |                                                          |                  |
| 2<br>(4 interventions)           | randomised trials | serious <sup>s</sup>     | not serious <sup>t</sup> | not serious          | not serious          | none                 | 111/163 (68.1%)         | 62/90 (68.9%)              | <b>RR 1.007</b><br>(0.800 to 1.268) | <b>5 more per 1000</b><br>(from 138 fewer to 185 more)   | ⊕⊕⊕○<br>MODERATE |
| <b>Acute atrial fibrillation</b> |                   |                          |                          |                      |                      |                      |                         |                            |                                     |                                                          |                  |
| 3                                | randomised trials | not serious <sup>u</sup> | not serious              | serious <sup>v</sup> | serious <sup>w</sup> | none                 | 11/47 (23.4%)           | 14/47 (29.8%)              | <b>RR 0.774</b><br>(0.418 to 1.431) | <b>67 fewer per 1000</b><br>(from 173 fewer to 128 more) | ⊕⊕○○<br>LOW      |
| <b>Infectious complications</b>  |                   |                          |                          |                      |                      |                      |                         |                            |                                     |                                                          |                  |
| 4                                | randomised trials | not serious <sup>x</sup> | not serious              | serious <sup>y</sup> | serious <sup>z</sup> | none                 | 5/75 (6.7%)             | 9/76 (11.8%)               | <b>RR 0.591</b><br>(0.227 to 1.536) | <b>48 fewer per 1000</b><br>(from 92 fewer to 63 more)   | ⊕⊕○○<br>LOW      |
| <b>Insulin treatment</b>         |                   |                          |                          |                      |                      |                      |                         |                            |                                     |                                                          |                  |

| Certainty assessment   |                   |                       |                       |                       |             |                      | № of patients           |                            | Effect                           |                                                      | Certainty        |
|------------------------|-------------------|-----------------------|-----------------------|-----------------------|-------------|----------------------|-------------------------|----------------------------|----------------------------------|------------------------------------------------------|------------------|
| № of studies           | Study design      | Risk of bias          | Inconsistency         | Indirectness          | Imprecision | Other considerations | OCH loading (treatment) | fasting or water (control) | Relative (95% CI)                | Absolute (95% CI)                                    |                  |
| 4                      | randomised trials | serious <sup>aa</sup> | serious <sup>ab</sup> | serious <sup>ac</sup> | not serious | none                 | 74/111 (66.7%)          | 72/113 (63.7%)             | <b>RR 1.026</b> (0.868 to 1.212) | <b>17 more per 1000</b> (from 84 fewer to 135 more)  | ⊕○○○<br>VERY LOW |
| <b>Arrhythmia</b>      |                   |                       |                       |                       |             |                      |                         |                            |                                  |                                                      |                  |
| 2<br>(4 interventions) | randomised trials | serious <sup>ad</sup> | not serious           | not serious           | not serious | none                 | 41/141 (29.1%)          | 19/68 (27.9%)              | <b>RR 0.897</b> (0.641 to 1.256) | <b>29 fewer per 1000</b> (from 100 fewer to 72 more) | ⊕⊕⊕○<br>MODERATE |

**CI:** Confidence interval; **MD:** Mean difference; **RR:** Risk ratio; **SMD:** Standardised mean difference; **PONV:** postoperative nausea and vomiting; **CPB** – cardio-pulmonary bypass; a. unclear risk of bias in selection bias, performance bias and detection bias in one study; b. unclear risk of bias in selection bias, performance bias and detection bias in one study; c. unclear risk of bias in selection bias, performance bias and detection bias in one study; d. substantial I<sup>2</sup>; e. unclear risk of bias in selection bias, performance bias and detection bias in one study; f. wide confidence intervals; g. unclear risk of bias in selection bias, detection bias and attrition bias in one study; h. moderate variance of point estimates across studies but confidence intervals (CI) overlap and very low I<sup>2</sup>; i. different time and oral dose of carbohydrate drink; j. small sample size and wide confidence intervals; k. unclear risk of bias in selection bias, detection bias and attrition bias in one study; l. minimal overlap of confidence intervals (CI) and moderate I<sup>2</sup>; m. different time and oral dose of carbohydrate drink; n. small sample size and wide confidence intervals; o. high value of I<sup>2</sup> (p<0,05); p. small sample size and wide confidence intervals; q. minimal overlap of confidence intervals (CI) and substantial value of I<sup>2</sup> (p<0,05); r. small sample size and wide confidence intervals; s. unclear or high risk of bias in selection bias, performance bias and detection bias in two studies; t. overlap of confidence intervals (CI) and moderate value of I<sup>2</sup> (p=0,054); u. unclear risk of bias in selection bias, detection bias and attrition bias in one study; v. different time and oral dose of carbohydrate drink; w. small sample size and wide confidence intervals; x. unclear risk of bias in selection bias, detection bias and attrition bias in one study; y. different time and oral dose of carbohydrate drink; z. small sample size and wide confidence intervals; aa. unclear or high risk of bias in selection, performance, detection or attrition bias in two studies; ab. minimal overlap of confidence intervals (CI); ac. different time and oral dose of carbohydrate drink; ad. only one high-quality (HQ) study;
